# Supplementary material for: A Randomized Clinical Trial to Assess the Efficacy and Safety of Real-Time Continuous Glucose Monitoring in the Management of Type 1 Diabetes in Young Children Aged 4 to &lt;10 Years
Source: Oxford University Press journal article supplement (doi:10.2337/dc11-1746), 2011-12-31
Supplement: dc111746supplementarydata.pdf [file dc111746supplementarydata.pdf]

# SUPPLEMENTARY DATA

**Supplementary Table 1.** HbA1c Outcomes in Subgroups

|                                     |           | <b>HbA1c at<br/>Randomization</b><br>Mean ± SD |                | <b>N(%) decreased 0.5%<br/>with no severe hypo</b> |                | <b>Change<sup>†</sup> from<br/>Randomization to 26<br/>weeks (%)</b><br>Mean ± SD |                | <b>% with 26 week HbA1c<br/>&lt;7.0%</b> |                |
|-------------------------------------|-----------|------------------------------------------------|----------------|----------------------------------------------------|----------------|-----------------------------------------------------------------------------------|----------------|------------------------------------------|----------------|
|                                     | <b>N*</b> | <b>CGM</b>                                     | <b>Control</b> | <b>CGM</b>                                         | <b>Control</b> | <b>CGM</b>                                                                        | <b>Control</b> | <b>CGM</b>                               | <b>Control</b> |
| <b>Overall</b>                      | 69/68     | 7.9 ± 0.8                                      | 7.9 ± 0.8      | 13 (19%)                                           | 19 (28%)       | -0.1 ± 0.6                                                                        | -0.1 ± 0.6     | 11 (16%)                                 | 10 (15%)       |
| <b>Age -yr</b>                      |           |                                                |                |                                                    |                |                                                                                   |                |                                          |                |
| 4-5                                 | 18/15     | 8.0 ± 0.8                                      | 8.0 ± 0.9      | 5 (28%)                                            | 4 (27%)        | -0.2 ± 0.6                                                                        | 0.0 ± 0.7      | 6 (33%)                                  | 2 (13%)        |
| 6-7                                 | 22/21     | 7.8 ± 0.9                                      | 7.7 ± 0.5      | 3 (14%)                                            | 6 (29%)        | 0.0 ± 0.5                                                                         | -0.2 ± 0.7     | 2 (9%)                                   | 4 (19%)        |
| 8-9                                 | 29/32     | 7.9 ± 0.8                                      | 7.9 ± 0.8      | 5 (17%)                                            | 9 (28%)        | -0.1 ± 0.8                                                                        | 0.0 ± 0.6      | 3 (10%)                                  | 4 (13%)        |
| <b>Gender</b>                       |           |                                                |                |                                                    |                |                                                                                   |                |                                          |                |
| Female                              | 31/31     | 8.0 ± 0.8                                      | 7.9 ± 0.6      | 5 (16%)                                            | 8 (26%)        | -0.2 ± 0.7                                                                        | -0.1 ± 0.7     | 5 (16%)                                  | 5 (16%)        |
| Male                                | 38/37     | 7.9 ± 0.8                                      | 7.9 ± 0.9      | 8 (21%)                                            | 11 (30%)       | 0.0 ± 0.6                                                                         | -0.1 ± 0.5     | 6 (16%)                                  | 5 (14%)        |
| <b>Race/Ethnicity<sup>‡</sup></b>   |           |                                                |                |                                                    |                |                                                                                   |                |                                          |                |
| White                               | 51/55     | 8.0 ± 0.8                                      | 7.9 ± 0.8      | 9 (18%)                                            | 17 (31%)       | -0.1 ± 0.7                                                                        | -0.1 ± 0.7     | 6 (12%)                                  | 7 (13%)        |
| Other                               | 18/12     | 7.7 ± 0.8                                      | 7.8 ± 0.7      | 4 (22%)                                            | 2 (17%)        | -0.1 ± 0.5                                                                        | 0.0 ± 0.5      | 5 (28%)                                  | 2 (17%)        |
| <b>Insulin Modality<sup>§</sup></b> |           |                                                |                |                                                    |                |                                                                                   |                |                                          |                |
| Pump                                | 39/47     | 7.7 ± 0.6                                      | 7.8 ± 0.7      | 10 (26%)                                           | 12 (26%)       | -0.1 ± 0.6                                                                        | -0.1 ± 0.6     | 7 (18%)                                  | 8 (17%)        |
| MDI                                 | 26/19     | 8.3 ± 0.9                                      | 8.1 ± 0.9      | 2 (8%)                                             | 7 (37%)        | 0.0 ± 0.7                                                                         | 0.0 ± 0.7      | 3 (12%)                                  | 1 (5%)         |
| <b>Baseline HbA1c (%)</b>           |           |                                                |                |                                                    |                |                                                                                   |                |                                          |                |
| <8.0                                | 41/42     | 7.4 ± 0.4                                      | 7.4 ± 0.4      | 5 (12%)                                            | 7 (17%)        | 0.0 ± 0.5                                                                         | +0.1 ± 0.6     | 10 (24%)                                 | 9 (21%)        |
| ≥8.0                                | 28/26     | 8.7 ± 0.6                                      | 8.6 ± 0.5      | 8 (29%)                                            | 12 (46%)       | -0.3 ± 0.8                                                                        | -0.3 ± 0.7     | 1 (4%)                                   | 1 (4%)         |
| <b>BMI Z score</b>                  |           |                                                |                |                                                    |                |                                                                                   |                |                                          |                |
| <0.5                                | 27/31     | 7.9 ± 0.7                                      | 7.7 ± 0.7      | 4 (15%)                                            | 9 (29%)        | 0.1 ± 0.5                                                                         | -0.1 ± 0.6     | 2 (7%)                                   | 6 (19%)        |
| ≥0.5                                | 42/37     | 7.9 ± 0.8                                      | 8.0 ± 0.8      | 9 (21%)                                            | 10 (27%)       | -0.2 ± 0.7                                                                        | -0.1 ± 0.7     | 9 (21%)                                  | 4 (11%)        |
| <b>Parent Education level</b>       |           |                                                |                |                                                    |                |                                                                                   |                |                                          |                |
| Lower than college                  | 19/23     | 8.0 ± 0.6                                      | 8.0 ± 0.5      | 7 (37%)                                            | 7 (30%)        | -0.3 ± 0.7                                                                        | 0.0 ± 0.6      | 5 (26%)                                  | 1 (4%)         |
| College or above                    | 50/45     | 7.9 ± 0.9                                      | 7.8 ± 0.9      | 6 (12%)                                            | 12 (27%)       | 0.0 ± 0.6                                                                         | -0.1 ± 0.7     | 6 (12%)                                  | 9 (20%)        |

\* # subjects at 26 wks: CGM/Control † – Negative change denotes a drop in A1c from baseline ‡ – One subject did not report race/ethnicity.

§ Excludes 4 in CGM group and 2 in control group who switched from MDI to pump (n= 5) or pump to MDI (n=1) during study.

SUPPLEMENTARY DATA

**Supplementary Table 2. CGM-measured Glycemic Indices\***

|                                                 | Baseline |          | 13 weeks |          | 26 weeks |          |                      |
|-------------------------------------------------|----------|----------|----------|----------|----------|----------|----------------------|
|                                                 | CGM      | Control  | CGM      | Control  | CGM      | Control  | P-value <sup>†</sup> |
|                                                 | N=62     | N=67     | N=61     | N=65     | N=62     | N=67     |                      |
| Mean Glucose (mg/dL) <i>mean</i> ± <i>SD</i>    | 194 ± 36 | 195 ± 35 | 190 ± 33 | 190 ± 36 | 191 ± 33 | 193 ± 33 | 0.30                 |
| % values 71-180 mg/dL ( <i>median</i> )         | 46%      | 48%      | 52%      | 50%      | 48%      | 49%      | 0.60                 |
| <b>Hypoglycemia</b> ( <i>median</i> )           |          |          |          |          |          |          |                      |
| % values ≤70 mg/dL                              | 2.7%     | 2.0%     | 2.0%     | 1.9%     | 1.5%     | 2.1%     | 0.78                 |
| % values ≤60 mg/dL                              | 1.0%     | 0.7%     | 0.5%     | 0.7%     | 0.4%     | 0.6%     | 0.31                 |
| % values ≤50 mg/dL                              | 0.2%     | 0.1%     | 0.0%     | 0.0%     | 0.0%     | 0.1%     | 0.13                 |
| Hypoglycemia Area under the Curve <sup>‡</sup>  | 0.3      | 0.2      | 0.1      | 0.2      | 0.1      | 0.2      | 0.29                 |
| LBGI <sup>§</sup>                               | 0.8      | 0.6      | 0.5      | 0.5      | 0.5      | 0.6      | 0.58                 |
| <b>Hyperglycemia</b> ( <i>median</i> )          |          |          |          |          |          |          |                      |
| % values >180 mg/dL                             | 49%      | 47%      | 44%      | 48%      | 50%      | 48%      | 0.82                 |
| % values >200 mg/dL                             | 44%      | 37%      | 35%      | 38%      | 39%      | 41%      | 0.72                 |
| % values >250 mg/dL                             | 25%      | 23%      | 19%      | 20%      | 20%      | 22%      | 0.18                 |
| Hyperglycemia Area under the Curve <sup>□</sup> | 41       | 39       | 32       | 33       | 33       | 39       | 0.16                 |
| HBGI <sup>¶</sup>                               | 13.8     | 12.7     | 11.4     | 12.1     | 11.3     | 13.2     | 0.24                 |
| CV(%) <sup>#</sup> ( <i>median</i> )            | 43%      | 43%      | 40%      | 41%      | 40%      | 41%      | 0.07                 |

\* This table is restricted to subjects with at least 24 hours of glucose data at 26 weeks.

† P-value from ANCOVA for the comparison of the treatment groups at 26 weeks adjusted for baseline value, baseline A1c, site and device type, based on the van der Warden transformations.

‡ Total area below 70 mg/dL; reflects both percentage and severity of glucose values in the hypoglycemic range

§ Low blood glucose index (1)

□ Total area above 180 mg/dL; reflects both percentage and severity of glucose values in the hyperglycemic range

¶ High blood glucose index (1)

# Coefficient of variation, a measure of glucose variability, defined as Standard Deviation divided by mean glucose.

# SUPPLEMENTARY DATA

**Supplementary Table 3.** Hypoglycemia Fear Survey\*

|                                                                                             | Baseline              |           |            |               |           |            | 26 week               |           |            |               |           |            |
|---------------------------------------------------------------------------------------------|-----------------------|-----------|------------|---------------|-----------|------------|-----------------------|-----------|------------|---------------|-----------|------------|
|                                                                                             | Mean score            | Never (0) | Rarely (1) | Sometimes (2) | Often (3) | Always (4) | Mean score            | Never (0) | Rarely (1) | Sometimes (2) | Often (3) | Always (4) |
|                                                                                             | CGM/Control (N=69/68) |           |            |               |           |            | CGM/Control (N=69/68) |           |            |               |           |            |
| <b>I worry about.....</b>                                                                   |                       |           |            |               |           |            |                       |           |            |               |           |            |
| 1. Not recognizing that my child's blood sugar is low                                       | 2.2/2.2               | 0%/1%     | 19%/22 %   | 54%/41%       | 17%/25%   | 10%/10 %   | 2.1/1.9               | 1%/7%     | 29%/24 %   | 41%/46%       | 17%/15 %  | 12%/9%     |
| 2. Not having food, fruit, or juice with me for my child                                    | 1.3/1.6               | 20%/13 %  | 42%/38 %   | 25%/32%       | 9%/7%     | 4%/9%      | 1.4/1.5               | 16%/12 %  | 43%/44 %   | 25%/32%       | 14%/7%    | 1%/4%      |
| 3. Having my child feel dizzy pass out in public because of low blood sugar low blood sugar | 1.4/1.5               | 20%/16 %  | 39%/38 %   | 28%/28%       | 7%/10%    | 6%/7%      | 1.3/1.4               | 26%/19 %  | 38%/37 %   | 25%/31%       | 6%/7%     | 6%/6%      |
| 4. Feeling that my child will have a reaction while asleep.                                 | 2.5/2.5               | 1%/0%     | 20%/18 %   | 28%/37%       | 25%/22%   | 26%/24 %   | 2.1/2.3               | 3%/0%     | 20%/18 %   | 45%/44%       | 25%/28 %  | 7%/10%     |
| 5. My child embarrassing him/herself because of low blood sugar.                            | 0.8/0.6               | 48%/60 %  | 33%/24 %   | 12%/10%       | 3%/4%     | 4%/1%      | 0.6/0.7               | 51%/54 %  | 39%/26 %   | 7%/13%        | 3%/3%     | 0%/3%      |
| 6. My child having a reaction when he/she is out of my care                                 | 2.8/2.8               | 0%/1%     | 10%/6%     | 28%/29%       | 30%/35%   | 32%/28 %   | 2.4/2.5               | 4%/0%     | 17%/13 %   | 32%/41%       | 28%/29 %  | 19%/16%    |
| 7. My child "not being with it" (disoriented)                                               | 1.6/1.8               | 12%/13 %  | 38%/25 %   | 41%/37%       | 4%/16%    | 6%/9%      | 1.4/1.6               | 19%/13 %  | 29%/35 %   | 42%/35%       | 9%/12%    | 1%/4%      |
| 8. My child losing control because of low blood sugar                                       | 1.4/1.7               | 14%/22 %  | 51%/22 %   | 25%/32%       | 3%/12%    | 7%/12%     | 1.2/1.4               | 25%/21 %  | 41%/34 %   | 26%/32%       | 6%/7%     | 3%/6%      |

# SUPPLEMENTARY DATA

|                                                                                                                                                                | Baseline              |              |               |                  |              |               | 26 week               |              |               |                  |              |               |
|----------------------------------------------------------------------------------------------------------------------------------------------------------------|-----------------------|--------------|---------------|------------------|--------------|---------------|-----------------------|--------------|---------------|------------------|--------------|---------------|
|                                                                                                                                                                | Mean<br>score         | Never<br>(0) | Rarely<br>(1) | Sometimes<br>(2) | Often<br>(3) | Always<br>(4) | Mean<br>score         | Never<br>(0) | Rarely<br>(1) | Sometimes<br>(2) | Often<br>(3) | Always<br>(4) |
|                                                                                                                                                                | CGM/Control (N=69/68) |              |               |                  |              |               | CGM/Control (N=69/68) |              |               |                  |              |               |
| <b>I worry about.....</b>                                                                                                                                      |                       |              |               |                  |              |               |                       |              |               |                  |              |               |
| 9. No one being around to help my child during a reaction                                                                                                      | 2.0/2.2               | 13%/10%      | 23%/18%       | 33%/38%          | 16%/13%      | 14%/21%       | 1.8/1.9               | 10%/12%      | 36%/32%       | 28%/21%          | 17%/26%      | 9%/9%         |
| 10. My child making a mistake or having an accident at school/daycare                                                                                          | 1.2/1.4               | 26%/26%      | 42%/26%       | 22%/31%          | 4%/10%       | 6%/6%         | 1.2/1.2               | 35%/28%      | 30%/40%       | 26%/21%          | 19%/7%       | 7%/4%         |
| 11. My child getting in trouble at school/daycare because of something that happens when his/her sugar is low something that happens when his/her sugar is low | 0.9/1.1               | 42%/40%      | 30%/28%       | 22%/19%          | 3%/7%        | 3%/6%         | 0.8/0.9               | 46%/47%      | 33%/31%       | 13%/12%          | 6%/7%        | 1%/3%         |
| 12. My child having seizures or convulsions                                                                                                                    | 1.6/1.7               | 26%/24%      | 25%/28%       | 25%/21%          | 14%/15%      | 10%/13%       | 1.0/1.4               | 36%/29%      | 36%/29%       | 20%/21%          | 3%/16%       | 4%/4%         |
| 13. My child developing long term complications from low blood sugar                                                                                           | 2.3/2.3               | 6%/9%        | 20%/19%       | 29%/26%          | 28%/21%      | 17%/25%       | 1.8/1.9               | 16%/10%      | 26%/26%       | 36%/37%          | 10%/13%      | 12%/13%       |
| 14. My child feeling dizzy or woozy when his/her blood sugar is low                                                                                            | 2.0/2.3               | 4%/1%        | 30%/22%       | 41%/40%          | 6%/24%       | 19%/13%       | 1.7/2.0               | 10%/6%       | 30%/24%       | 43%/41%          | 13%/19%      | 3%/10%        |

# SUPPLEMENTARY DATA

|                                                               | Baseline              |              |               |                  |              |               | 26 week               |              |               |                  |              |               |
|---------------------------------------------------------------|-----------------------|--------------|---------------|------------------|--------------|---------------|-----------------------|--------------|---------------|------------------|--------------|---------------|
|                                                               | Mean<br>score         | Never<br>(0) | Rarely<br>(1) | Sometimes<br>(2) | Often<br>(3) | Always<br>(4) | Mean<br>score         | Never<br>(0) | Rarely<br>(1) | Sometimes<br>(2) | Often<br>(3) | Always<br>(4) |
|                                                               | CGM/Control (N=69/68) |              |               |                  |              |               | CGM/Control (N=69/68) |              |               |                  |              |               |
| I worry about.....                                            |                       |              |               |                  |              |               |                       |              |               |                  |              |               |
| 15. My child having a low blood sugar during school or sports | 2.6/2.6               | 0%/0%        | 10%/10%       | 38%/41%          | 30%/25%      | 22%/24%       | 2.1/2.4               | 4%/1%        | 19%/15%       | 43%/43%          | 29%/28%      | 4%/13%        |

\* Scale 0-4. Higher score denotes more fear.

# SUPPLEMENTARY DATA

**Supplementary Table 4.** Item Responses on the CGM-Satisfaction Scale\* at 26 Weeks  
(ordered by mean score)

|                                                                                           |               | Percentage            |     |         |                        |     |
|-------------------------------------------------------------------------------------------|---------------|-----------------------|-----|---------|------------------------|-----|
|                                                                                           | Mean<br>Score | Negative <sup>†</sup> |     | Neutral | Favorable <sup>†</sup> |     |
|                                                                                           |               | 1                     | 2   | 3       | 4                      | 5   |
| <b>USING THE CONTINUOUS MONITOR:</b>                                                      |               |                       |     |         |                        |     |
| Makes me feel safer knowing that I will be warned about low blood sugar before it happens | 4.6           | 0%                    | 1%  | 3%      | 33%                    | 62% |
| ► I don't recommend this for other children with diabetes                                 | 4.6           | 0%                    | 0%  | 6%      | 33%                    | 61% |
| I want to use this device when it is approved for sale                                    | 4.4           | 0%                    | 4%  | 6%      | 30%                    | 59% |
| Makes adjusting insulin easier                                                            | 4.3           | 0%                    | 3%  | 6%      | 51%                    | 41% |
| Shows patterns in blood sugars that we didn't see before                                  | 4.3           | 1%                    | 0%  | 6%      | 55%                    | 38% |
| ► Is more trouble than it is worth                                                        | 4.3           | 3%                    | 3%  | 9%      | 36%                    | 49% |
| Helps in adjusting doses of insulin needed through the night                              | 4.3           | 0%                    | 1%  | 12%     | 46%                    | 41% |
| Helps me to relax, knowing that unwanted changes in blood sugar will be detected quickly  | 4.2           | 1%                    | 0%  | 9%      | 55%                    | 35% |
| ► Skips too many readings to be useful                                                    | 4.2           | 0%                    | 1%  | 9%      | 57%                    | 33% |
| Helps me to be sure about making diabetes decisions                                       | 4.2           | 0%                    | 3%  | 9%      | 58%                    | 30% |
| Has made me worry less about having low blood sugars                                      | 4.1           | 1%                    | 9%  | 4%      | 46%                    | 39% |
| Helps to keep low blood sugars from happening                                             | 4.1           | 1%                    | 6%  | 7%      | 51%                    | 35% |
| Helps prevent problems rather than fixing them after they've happened                     | 4.1           | 1%                    | 0%  | 10%     | 62%                    | 26% |
| ► The feedback from the device is not easy to understand or useful                        | 4.1           | 0%                    | 4%  | 12%     | 57%                    | 28% |
| Makes it clearer how some everyday habits affect blood sugar levels                       | 4.0           | 0%                    | 1%  | 14%     | 62%                    | 22% |
| ► Gives a lot of results that don't make sense                                            | 4.0           | 0%                    | 4%  | 17%     | 52%                    | 26% |
| ► Causes me to be more worried about controlling blood sugars                             | 4.0           | 3%                    | 10% | 7%      | 46%                    | 33% |
| Teaches me how eating affects blood sugar                                                 | 4.0           | 0%                    | 1%  | 20%     | 58%                    | 20% |
| ► Makes it harder to sleep                                                                | 3.9           | 3%                    | 7%  | 14%     | 43%                    | 32% |

# SUPPLEMENTARY DATA

|                                                                   |     |    |     |     |     |     |
|-------------------------------------------------------------------|-----|----|-----|-----|-----|-----|
| ► Causes more embarrassment about feeling different from others   | 3.9 | 4% | 6%  | 12% | 48% | 30% |
| Has taught me new things about diabetes that I didn't know before | 3.9 | 1% | 3%  | 25% | 43% | 28% |
| ► Has caused more family arguments                                | 3.9 | 4% | 6%  | 17% | 38% | 35% |
| Allows more freedom in daily life                                 | 3.9 | 1% | 3%  | 20% | 57% | 19% |
| ► Causes our family to talk about blood sugars too much           | 3.9 | 1% | 3%  | 19% | 59% | 17% |
| Helps with keeping diabetes under control on sick days            | 3.9 | 0% | 1%  | 26% | 58% | 14% |
| ► Interferes a lot with sports, playing outside, etc              | 3.9 | 3% | 3%  | 19% | 57% | 19% |
| Has helped to adjust pre-meal insulin doses                       | 3.9 | 1% | 4%  | 16% | 64% | 14% |
| ► Makes me think about diabetes too much                          | 3.8 | 1% | 9%  | 22% | 43% | 25% |
| ► Causes others to ask too many questions about diabetes          | 3.8 | 3% | 9%  | 22% | 41% | 26% |
| Has helped me to learn how to treat low sugars better             | 3.8 | 1% | 7%  | 13% | 68% | 10% |
| ► Causes too many interruptions during the day                    | 3.8 | 4% | 4%  | 17% | 57% | 17% |
| ► Causes too many hassles in daily life                           | 3.8 | 3% | 6%  | 28% | 39% | 25% |
| ► Sometimes gives too much information to work with               | 3.8 | 1% | 14% | 12% | 52% | 20% |
| Has helped me to learn about the right amount of exercise         | 3.7 | 1% | 9%  | 26% | 43% | 20% |
| Makes it easier to complete other diabetes self care duties       | 3.7 | 1% | 4%  | 29% | 51% | 14% |
| ► Is too hard to get working right                                | 3.7 | 6% | 7%  | 17% | 48% | 22% |
| ► Alarms too often for no good reason                             | 3.5 | 4% | 14% | 17% | 52% | 12% |
| Has helped to control diabetes better even when not wearing it    | 3.5 | 0% | 14% | 35% | 41% | 10% |
| Has helped my family to get along better about diabetes           | 3.4 | 4% | 7%  | 38% | 42% | 9%  |
| ► Has been harder or more complicated than expected               | 3.4 | 9% | 17% | 19% | 32% | 23% |
| ► Shows more “glitches” and “bugs” than it should                 | 3.4 | 4% | 16% | 22% | 48% | 10% |
| ► Is uncomfortable or painful                                     | 3.3 | 3% | 26% | 19% | 39% | 13% |
| Has made it easier to accept doing blood sugar tests              | 3.3 | 4% | 13% | 39% | 39% | 4%  |

\* Scoring on a 5 point Likert scale with a higher value denoting more favorable response towards CGM use; ► indicates a negatively worded item, the scoring of which has been reversed so that a higher score denotes a more favorable response towards CGM.

† Favorable denotes agree/strongly agree with a positively worded statement or disagree/strongly disagree with a negatively worded statement. Negative denotes vice-versa.



# SUPPLEMENTARY DATA

## Supplementary Table 5. Blood Glucose Monitoring System Rating Questionnaire

### A. In the past month, has this been a problem?\*

|                                                                    | Baseline              |           |          |                 |                | 26 week               |           |          |                 |                |
|--------------------------------------------------------------------|-----------------------|-----------|----------|-----------------|----------------|-----------------------|-----------|----------|-----------------|----------------|
|                                                                    | Mean score            | A Lot (1) | Some (2) | Very Little (3) | Not at all (4) | Mean score            | A Lot (1) | Some (2) | Very Little (3) | Not at all (4) |
|                                                                    | CGM/Control (N=69/68) |           |          |                 |                | CGM/Control (N=69/68) |           |          |                 |                |
| 1. Worry or fear about high blood sugar                            | 2.0/1.7               | 23%/41%   | 59%/49%  | 12%/7%          | 6%/3%          | 2.3/1.9               | 19%/22%   | 42%/65%  | 32%/12%         | 7%/1%          |
| 2. Effort to keep high blood sugars from happening                 | 1.8/1.6               | 39%/50%   | 46%/41%  | 10%/7%          | 4%/1%          | 2.1/1.7               | 20%/40%   | 52%/49%  | 25%/12%         | 3%/0%          |
| 3. Worry or fear about low blood sugar                             | 1.8/1.6               | 45%/44%   | 30%/49%  | 20%/6%          | 4%/1%          | 2.2/1.9               | 20%/29%   | 43%/56%  | 30%/15%         | 6%/0%          |
| 4. Effort to keep low blood sugars from happening                  | 1.8/1.8               | 43%/34%   | 32%/54%  | 22%/7%          | 3%/4%          | 2.3/1.9               | 20%/31%   | 42%/47%  | 29%/21%         | 9%/1%          |
| 5. Worry or fear about low blood sugar during sleep                | 1.8/1.8               | 54%/44%   | 20%/32%  | 14%/21%         | 12%/3%         | 2.3/2.0               | 23%/29%   | 36%/47%  | 32%/22%         | 9%/1%          |
| 6. Trouble sleeping well                                           | 2.6/2.5               | 26%/18%   | 19%/35%  | 26%/31%         | 29%/16%        | 2.9/2.6               | 10%/16%   | 25%/29%  | 32%/34%         | 33%/21%        |
| 7. Hard to predict blood sugar readings                            | 2.0/1.9               | 29%/28%   | 45%/53%  | 19%/16%         | 7%/3%          | 2.7/2.2               | 9%/12%    | 32%/57%  | 45%/26%         | 14%/4%         |
| 8. Feeling different from others                                   | 2.7/2.4               | 10%/19%   | 33%/38%  | 35%/28%         | 22%/15%        | 3.0/2.6               | 9%/9%     | 20%/38%  | 30%/41%         | 41%/12%        |
| 9. Amount of time spent thinking about diabetes                    | 1.8/1.6               | 49%/57%   | 26%/28%  | 16%/15%         | 9%/0%          | 2.1/1.6               | 26%/51%   | 42%/34%  | 26%/13%         | 6%/1%          |
| 10. Not knowing how eating affects your blood sugar                | 2.5/2.5               | 12%/13%   | 33%/38%  | 45%/34%         | 10%/15%        | 2.9/2.7               | 3%/4%     | 28%/35%  | 43%/47%         | 26%/13%        |
| 11. Meal plan is too strict                                        | 3.3/3.1               | 1%/4%     | 13%/19%  | 38%/37%         | 48%/40%        | 3.3/3.1               | 3%/4%     | 14%/16%  | 33%/41%         | 49%/38%        |
| 12. Amount of time and care needed for diabetes by my family or me | 2.0/2.0               | 35%/35%   | 41%/44%  | 14%/10%         | 10%/10%        | 2.3/1.8               | 17%/43%   | 42%/34%  | 32%/21%         | 9%/3%          |
| 13. Worry or fear about long term health                           | 2.0/1.8               | 41%/43%   | 32%/46%  | 12%/6%          | 16%/6%         | 2.3/1.9               | 19%/40%   | 42%/37%  | 29%/22%         | 10%/1%         |

## SUPPLEMENTARY DATA

|                                                              |         |         |         |         |         |         |        |         |         |         |
|--------------------------------------------------------------|---------|---------|---------|---------|---------|---------|--------|---------|---------|---------|
| 14. Pain or discomfort from finger sticks or sensors         | 2.9/2.5 | 1%/9%   | 36%/44% | 38%/34% | 25%/13% | 2.7/2.6 | 7%/9%  | 32%/34% | 43%/46% | 17%/12% |
| 15. Pain or discomfort from insulin shots or pump sets       | 2.5/2.3 | 7%/9%   | 46%/60% | 38%/22% | 9%/9%   | 2.8/2.5 | 7%/7%  | 25%/43% | 54%/41% | 14%/9%  |
| 16. Family arguments or worries about diabetes               | 2.8/2.5 | 10%/18% | 28%/32% | 38%/29% | 25%/21% | 2.9/2.6 | 6%/9%  | 28%/38% | 33%/32% | 33%/21% |
| 17. Handling work or school along with diabetes              | 2.5/2.4 | 13%/21% | 39%/31% | 33%/35% | 14%/13% | 2.7/2.3 | 9%/18% | 33%/46% | 33%/24% | 25%/13% |
| 18. Talking part in sports, exercise or playing              | 3.0/3.1 | 7%/3%   | 26%/24% | 28%/34% | 39%/40% | 3.2/3.0 | 1%/4%  | 20%/24% | 36%/44% | 42%/28% |
| 19. Knowing how much insulin to take                         | 2.6/2.9 | 7%/4%   | 39%/32% | 36%/37% | 17%/26% | 3.0/2.9 | 1%/4%  | 28%/25% | 45%/50% | 26%/21% |
| 20. Keeping up with friends or peers who don't have diabetes | 3.4/3.2 | 4%/4%   | 6%/16%  | 36%/38% | 54%/41% | 3.4/3.1 | 1%/6%  | 10%/13% | 32%/41% | 57%/40% |
| 21. Reacting to all of the blood sugar results that I get    | 2.6/2.6 | 10%/7%  | 38%/41% | 35%/35% | 17%/16% | 2.9/2.7 | 4%/4%  | 29%/41% | 36%/34% | 30%/21% |
| 22. Dealing with others who ask about diabetes               | 3.3/3.1 | 3%/4%   | 13%/21% | 35%/40% | 49%/35% | 3.3/3.1 | 3%/1%  | 12%/18% | 35%/47% | 51%/34% |

\* Scale 1-4. Higher score denotes fewer problems.

# SUPPLEMENTARY DATA

## B. How has it changed in last 6 months?\*

|                                                                    | Baseline              |           |          |            | 26 week               |           |          |            |
|--------------------------------------------------------------------|-----------------------|-----------|----------|------------|-----------------------|-----------|----------|------------|
|                                                                    | Mean score            | Worse (1) | Same (2) | Better (3) | Mean score            | Worse (1) | Same (2) | Better (3) |
|                                                                    | CGM/Control (N=69/68) |           |          |            | CGM/Control (N=69/68) |           |          |            |
| 1. Worry or fear about high blood sugar                            | 2.0/1.9               | 12%/19%   | 72%/68%  | 16%/13%    | 2.5/2.1               | 3%/10%    | 42%/68%  | 55%/22%    |
| 2. Effort to keep high blood sugars from happening                 | 2.1/2.0               | 9%/13%    | 75%/74%  | 16%/13%    | 2.5/2.1               | 3%/12%    | 45%/62%  | 52%/26%    |
| 3. Worry or fear about low blood sugar                             | 2.1/2.0               | 4%/9%     | 81%/78%  | 14%/13%    | 2.6/2.0               | 3%/6%     | 33%/85%  | 64%/9%     |
| 4. Effort to keep low blood sugars from happening                  | 2.1/2.1               | 3%/3%     | 81%/85%  | 16%/12%    | 2.6/2.1               | 3%/4%     | 33%/81%  | 64%/15%    |
| 5. Worry or fear about low blood sugar during sleep                | 2.1/2.0               | 9%/13%    | 77%/74%  | 14%/13%    | 2.6/2.1               | 4%/7%     | 35%/79%  | 61%/13%    |
| 6. Trouble sleeping well                                           | 1.9/2.0               | 12%/6%    | 87%/88%  | 1%/6%      | 2.4/2.0               | 4%/3%     | 54%/91%  | 42%/6%     |
| 7. Hard to predict blood sugar readings                            | 2.0/2.0               | 7%/9%     | 90%/82%  | 3%/9%      | 2.6/2.1               | 3%/4%     | 39%/85%  | 58%/10%    |
| 8. Feeling different from others                                   | 2.0/1.9               | 6%/13%    | 91%/82%  | 3%/4%      | 2.1/2.0               | 7%/6%     | 74%/88%  | 19%/6%     |
| 9. Amount of time spent thinking about diabetes                    | 2.0/2.0               | 12%/12%   | 80%/81%  | 9%/7%      | 2.3/2.0               | 4%/4%     | 65%/91%  | 30%/4%     |
| 10. Not knowing how eating affects your blood sugar                | 2.1/2.1               | 1%/3%     | 86%/84%  | 13%/13%    | 2.4/2.1               | 3%/1%     | 49%/87%  | 48%/12%    |
| 11. Meal plan is too strict                                        | 2.0/2.1               | 0%/3%     | 97%/84%  | 3%/13%     | 2.2/2.1               | 1%/3%     | 75%/87%  | 23%/10%    |
| 12. Amount of time and care needed for diabetes by my family or me | 1.9/2.0               | 10%/3%    | 86%/91%  | 4%/6%      | 2.2/2.0               | 7%/6%     | 68%/87%  | 25%/7%     |
| 13. Worry or fear about long term health                           | 2.0/1.9               | 7%/12%    | 87%/85%  | 6%/3%      | 2.2/2.0               | 6%/7%     | 68%/85%  | 26%/7%     |
| 14. Pain or discomfort from finger sticks or sensors               | 2.0/2.0               | 1%/4%     | 97%/94%  | 1%/1%      | 2.2/2.0               | 4%/6%     | 75%/91%  | 20%/3%     |
| 15. Pain or discomfort from insulin shots or pump sets             | 2.0/2.0               | 4%/7%     | 88%/88%  | 7%/4%      | 2.1/2.0               | 7%/6%     | 80%/91%  | 13%/3%     |

## SUPPLEMENTARY DATA

|                                                              |         |         |         |         |         |        |         |         |
|--------------------------------------------------------------|---------|---------|---------|---------|---------|--------|---------|---------|
| 16. Family arguments or worries about diabetes               | 2.0/1.9 | 6%/16%  | 87%/79% | 7%/4%   | 2.1/2.0 | 10%/4% | 72%/87% | 17%/9%  |
| 17. Handling work or school along with diabetes              | 2.0/1.9 | 10%/15% | 75%/81% | 14%/4%  | 2.2/2.1 | 10%/7% | 57%/79% | 33%/13% |
| 18. Talking part in sports, exercise or playing              | 2.1/2.0 | 0%/3%   | 91%/90% | 9%/7%   | 2.3/2.0 | 1%/6%  | 65%/91% | 33%/3%  |
| 19. Knowing how much insulin to take                         | 2.1/2.1 | 3%/4%   | 87%/81% | 10%/15% | 2.4/2.0 | 3%/1%  | 55%/94% | 42%/4%  |
| 20. Keeping up with friends or peers who don't have diabetes | 2.0/2.0 | 4%/1%   | 90%/94% | 6%/4%   | 2.3/2.0 | 1%/3%  | 71%/96% | 28%/1%  |
| 21. Reacting to all of the blood sugar results that I get    | 2.0/2.0 | 4%/7%   | 87%/87% | 9%/6%   | 2.3/2.0 | 3%/6%  | 61%/84% | 36%/10% |
| 22. Dealing with others who ask about diabetes               | 2.0/2.0 | 4%/3%   | 91%/93% | 4%/4%   | 2.1/2.1 | 4%/1%  | 78%/90% | 17%/9%  |

\* Scale 1-3. Higher score denotes improvement

SUPPLEMENTARY DATA

**Supplementary Table 6.** Pediatric Assessment In Diabetes Survey (PAID)\*

|                                                                                           | Baseline              |             |         |                |            |         | 26 week               |             |          |                |            |         |
|-------------------------------------------------------------------------------------------|-----------------------|-------------|---------|----------------|------------|---------|-----------------------|-------------|----------|----------------|------------|---------|
|                                                                                           | Mean<br>Score         | Favorable † |         | Neutral<br>(2) | Negative † |         | Mean<br>Score         | Favorable † |          | Neutral<br>(2) | Negative † |         |
|                                                                                           |                       | (0)         | (1)     |                | (3)        | (4)     |                       | (0)         | (1)      |                | (3)        | (4)     |
|                                                                                           | CGM/Control (N=69/68) |             |         |                |            |         | CGM/Control (N=69/68) |             |          |                |            |         |
| 1. I have clear and concrete goals for my child’s diabetes care.                          | 0.5/0.4               | 61%/63%     | 30%/34% | 7%/1%          | 1%/1%      | 0%/0%   | 0.5/0.4               | 57%/63 %    | 36%/32 % | 4%/4%          | 3%/0%      | 0%/0%   |
| 2. ► I feel discouraged with my child’s diabetes treatment plan.                          | 1.0/1.1               | 48%/49%     | 23%/21% | 14%/9%         | 13%/18%    | 1%/4%   | 0.6/0.9               | 57%/50 %    | 29%/28 % | 12%/9%         | 3%/10%     | 0%/3%   |
| 3. ► I feel scared when thinking about my child having/living with diabetes.              | 3.0/3.1               | 3%/3%       | 9%/7%   | 10%/12 %       | 42%/29%    | 36%/49% | 2.4/2.8               | 13%/7%      | 13%/10 % | 14%/12 %       | 38%/34%    | 22%/37% |
| 4. ► I have difficulty dealing with school staff (e.g., nurses, teachers, principals).    | 1.2/1.1               | 48%/50%     | 12%/19% | 22%/10 %       | 14%/15%    | 4%/6%   | 0.9/0.9               | 52%/56 %    | 20%/19 % | 14%/12 %       | 9%/7%      | 4%/6%   |
| 5. ► I feel that my child is deprived regarding food and meals.                           | 1.3/1.5               | 43%/34%     | 16%/16% | 13%/18 %       | 26%/26%    | 1%/6%   | 0.9/1.3               | 46%/38 %    | 28%/26 % | 12%/10 %       | 14%/21%    | 0%/4%   |
| 6. ► I feel that my child is excluded from activities/events because of his/her diabetes. | 1.0/1.4               | 43%/40%     | 29%/19% | 14%/10 %       | 10%/26%    | 3%/4%   | 0.8/1.0               | 54%/53 %    | 30%/18 % | 4%/7%          | 10%/21%    | 1%/1%   |

# SUPPLEMENTARY DATA

|                                                                                                        | Baseline              |                        |         |                |                       |         | 26 week               |                        |          |                |                       |         |
|--------------------------------------------------------------------------------------------------------|-----------------------|------------------------|---------|----------------|-----------------------|---------|-----------------------|------------------------|----------|----------------|-----------------------|---------|
|                                                                                                        | Mean<br>Score         | Favorable <sup>†</sup> |         | Neutral<br>(2) | Negative <sup>†</sup> |         | Mean<br>Score         | Favorable <sup>†</sup> |          | Neutral<br>(2) | Negative <sup>†</sup> |         |
|                                                                                                        |                       | (0)                    | (1)     |                | (3)                   | (4)     |                       | (0)                    | (1)      |                | (3)                   | (4)     |
|                                                                                                        | CGM/Control (N=69/68) |                        |         |                |                       |         | CGM/Control (N=69/68) |                        |          |                |                       |         |
| 7. I know whether the mood or behavior my child is displaying is related to his/her blood sugar level. | 1.1/1.2               | 22%/22%                | 57%/50% | 12%/16 %       | 6%/7%                 | 4%/4%   | 1.3/1.3               | 23%/19 %               | 49%/51 % | 9%/13%         | 14%/15%               | 4%/1%   |
| 8. ► I feel upset when my child’s blood sugars are out of range.                                       | 3.2/3.1               | 1%/3%                  | 4%/3%   | 12%/12 %       | 38%/44%               | 45%/38% | 2.9/2.9               | 4%/1%                  | 9%/13%   | 20%/10 %       | 29%/44%               | 38%/31% |
| 9. ► I worry about my child having a low blood sugar.                                                  | 3.5/3.6               | 1%/0%                  | 3%/0%   | 6%/9%          | 23%/22%               | 67%/69% | 2.9/3.3               | 3%/0%                  | 9%/1%    | 13%/12 %       | 42%/41%               | 33%/46% |
| 10. ► I feel angry when I think about my child having/living with diabetes.                            | 2.1/2.4               | 22%/16%                | 17%/9%  | 14%/21 %       | 25%/25%               | 22%/29% | 2.1/2.0               | 19%/25 %               | 17%/12 % | 17%/19 %       | 29%/26%               | 17%/18% |
| 11. ► I feel constantly concerned about what my child eats.                                            | 2.6/3.0               | 10%/3%                 | 12%/15% | 13%/7%         | 36%/31%               | 29%/44% | 2.2/2.9               | 19%/4%                 | 12%/6%   | 20%/15 %       | 28%/49%               | 22%/26% |
| 12. ► I worry about the future and the possibility of serious complications for my child.              | 3.3/3.6               | 6%/0%                  | 4%/1%   | 4%/6%          | 23%/22%               | 62%/71% | 3.0/3.2               | 6%/3%                  | 9%/3%    | 7%/6%          | 36%/46%               | 42%/43% |

# SUPPLEMENTARY DATA

|                                                                                            | Baseline              |                        |         |                |                       |         | 26 week               |                        |             |                |                       |         |
|--------------------------------------------------------------------------------------------|-----------------------|------------------------|---------|----------------|-----------------------|---------|-----------------------|------------------------|-------------|----------------|-----------------------|---------|
|                                                                                            | Mean<br>Score         | Favorable <sup>†</sup> |         | Neutral<br>(2) | Negative <sup>†</sup> |         | Mean<br>Score         | Favorable <sup>†</sup> |             | Neutral<br>(2) | Negative <sup>†</sup> |         |
|                                                                                            |                       | (0)                    | (1)     |                | (3)                   | (4)     |                       | (0)                    | (1)         |                | (3)                   | (4)     |
|                                                                                            | CGM/Control (N=69/68) |                        |         |                |                       |         | CGM/Control (N=69/68) |                        |             |                |                       |         |
| 13. ► I feel upset when my child’s diabetes management is “off track.”                     | 3.3/3.4               | 1%/1%                  | 4%/1%   | 10%/6%         | 33%/35%               | 51%/56% | 2.9/3.2               | 3%/3%                  | 12%/4%      | 7%/9%          | 45%/38%               | 33%/46% |
| 14. ► I worry that my child will not be taken care of when away from home.                 | 2.9/2.6               | 7%/12%                 | 10%/15% | 10%/7%         | 33%/31%               | 39%/35% | 2.3/2.3               | 13%/10<br>%            | 19%/24<br>% | 10%/10<br>%    | 38%/38%               | 20%/18% |
| 15. ► I feel like the “diabetes police.”                                                   | 2.7/2.9               | 9%/6%                  | 9%/6%   | 17%/18<br>%    | 38%/38%               | 28%/32% | 2.3/2.4               | 19%/15<br>%            | 12%/10<br>% | 12%/19<br>%    | 39%/34%               | 19%/22% |
| 16. ► I feel that diabetes takes up too much mental and physical energy.                   | 2.1/2.5               | 17%/15%                | 19%/6%  | 23%/22<br>%    | 22%/25%               | 19%/32% | 1.9/2.3               | 17%/18<br>%            | 28%/10<br>% | 19%/24<br>%    | 19%/26%               | 17%/22% |
| 17. ► I feel alone in managing my child’s diabetes.                                        | 1.3/1.5               | 38%/37%                | 23%/18% | 12%/9%         | 22%/28%               | 6%/9%   | 1.2/1.2               | 42%/50<br>%            | 25%/12<br>% | 10%/10<br>%    | 19%/21%               | 4%/7%   |
| 18. ► I feel that other family members are not supportive in managing my child’s diabetes. | 1.2/1.3               | 46%/43%                | 17%/18% | 10%/10<br>%    | 20%/25%               | 6%/4%   | 1.1/1.3               | 42%/49<br>%            | 30%/12<br>% | 6%/12%         | 20%/18%               | 1%/10%  |
| 19. ► I worry whether or not my child will remember to eat his/her snack.                  | 1.5/1.5               | 36%/41%                | 17%/13% | 16%/12<br>%    | 20%/21%               | 10%/13% | 1.2/1.4               | 28%/32<br>%            | 42%/25<br>% | 17%/16<br>%    | 9%/21%                | 4%/6%   |

# SUPPLEMENTARY DATA

|                                                                      | Baseline              |             |        |                |            |         | 26 week               |             |          |                |            |         |
|----------------------------------------------------------------------|-----------------------|-------------|--------|----------------|------------|---------|-----------------------|-------------|----------|----------------|------------|---------|
|                                                                      | Mean<br>Score         | Favorable † |        | Neutral<br>(2) | Negative † |         | Mean<br>Score         | Favorable † |          | Neutral<br>(2) | Negative † |         |
|                                                                      |                       | (0)         | (1)    |                | (3)        | (4)     |                       | (0)         | (1)      |                | (3)        | (4)     |
|                                                                      | CGM/Control (N=69/68) |             |        |                |            |         | CGM/Control (N=69/68) |             |          |                |            |         |
| 20. ► I feel “burned out” by the constant effort to manage diabetes. | 2.0/2.4               | 23%/18%     | 13%/7% | 22%/15 %       | 22%/38%    | 20%/22% | 1.8/2.0               | 20%/25 %    | 28%/10 % | 14%/21 %       | 23%/26%    | 14%/18% |

\* Scale 0-4. Higher score denotes worse condition. ► indicates a negatively worded item, the scoring of which has been reversed so that a higher score denotes worse condition.

† Favorable denotes agree/somewhat agree with a positively worded statement or disagree/somewhat disagree with a negatively worded statement. Negative denotes vice-versa.

# SUPPLEMENTARY DATA

**Supplementary Figure 1. Participant Flow Chart**

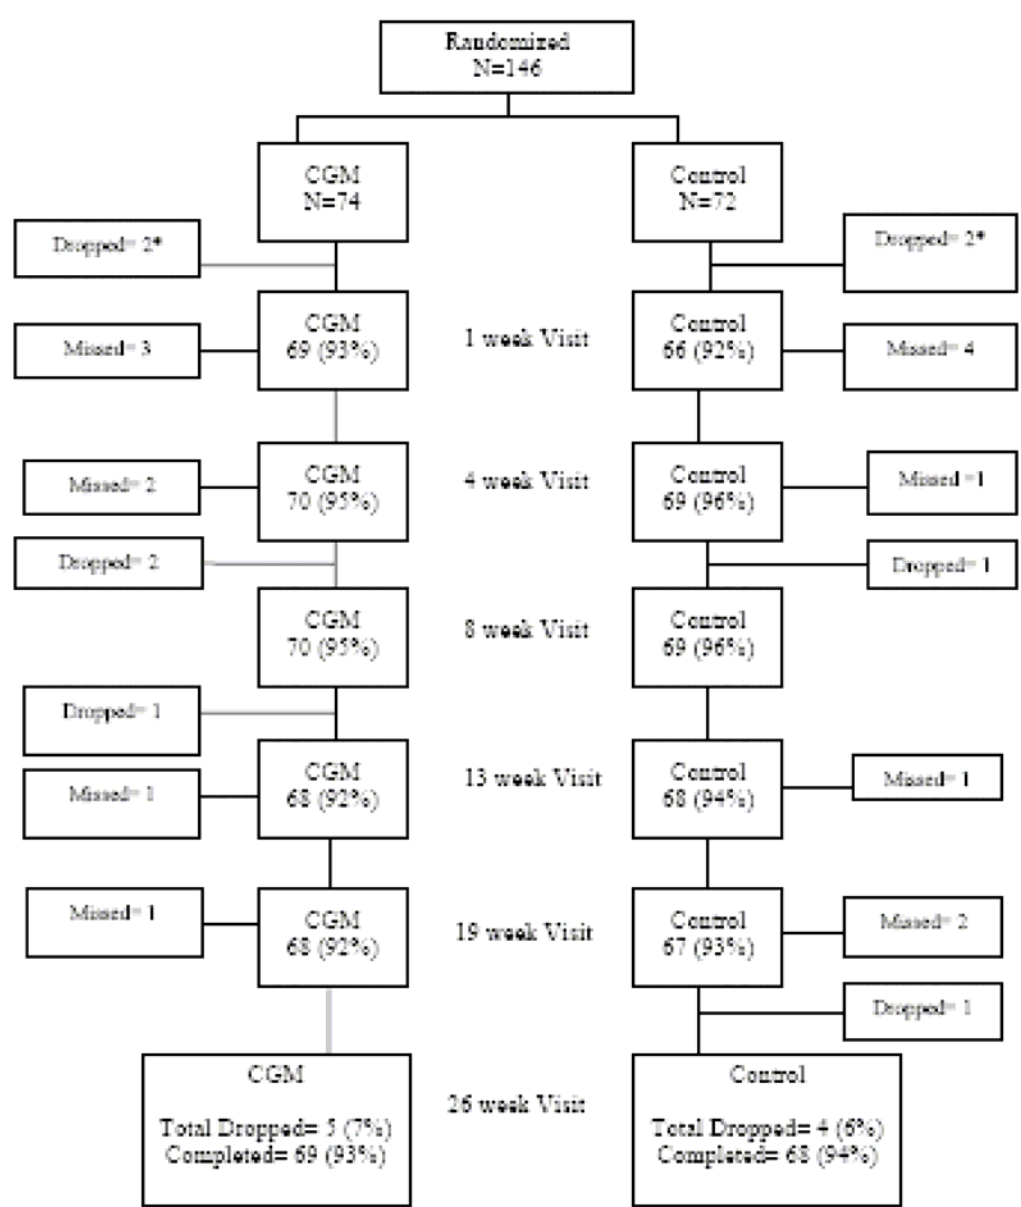

**Supplementary Figure 2.** HbA1c at Baseline Versus HbA1c at 26 Weeks

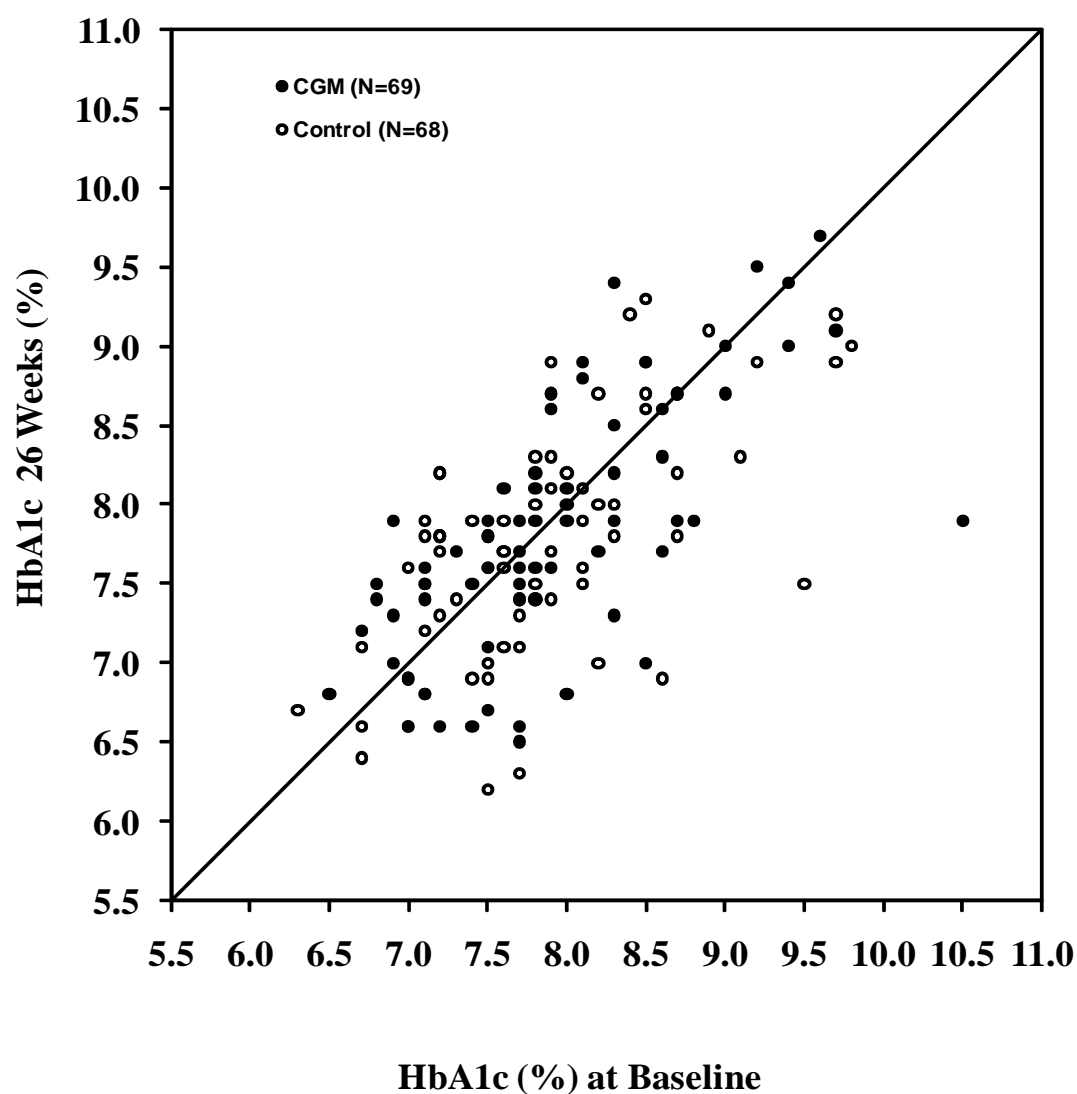

## REFERENCES

1. Kovatchev, B, Clarke, W, Breton, M, Brayman, K, McCall, A. Quantifying Temporal Glucose Variability in Diabetes via Continuous Glucose Monitoring: Mathematical Methods and Clinical Application. *Diabetes Technol Ther* 2005;7:849-862
